# Supplementary material
Source: PubMed Central journal article supplement (PMC4759418)
Supplement: ajtr0008-0081-f5.pdf [file ajtr0008-0081-f5.pdf]

## Prognostic significance of aromatase/ER $\beta$ in lung adenocarcinoma

**Table S1.** Association between clinicopathological factors and immunoreactivity for aromatase in 150 lung adenocarcinomas

|                        | Aromatase       |            |                |            | P value | ER $\beta$ |            |          |            | P value |
|------------------------|-----------------|------------|----------------|------------|---------|------------|------------|----------|------------|---------|
|                        | High expression |            | Low expression |            |         | Positive   |            | Negative |            |         |
|                        | N = 72          | % (range)  | N = 78         | % (range)  |         | N = 119    | % (range)  | N = 31   | % (range)  |         |
| Age (years: median 69) | 68              | (40–83)    | 65             | (36–84)    | 0.077   | 67         | (40–83)    | 63       | (36–84)    | 0.066   |
| Sex                    |                 |            |                |            |         |            |            |          |            |         |
| Male                   | 33              | 22.0       | 30             | 20.0       |         | 48         | 32.0       | 15       | 10.0       |         |
| Female                 | 39              | 26.0       | 48             | 32.0       | 0.361   | 71         | 47.3       | 16       | 10.7       | 0.272   |
| Smoking status         |                 |            |                |            |         |            |            |          |            |         |
| Ever-smoker            | 35              | 23.3       | 33             | 22.0       |         | 54         | 36.0       | 14       | 9.3        |         |
| Non-smoker             | 37              | 24.7       | 45             | 30.0       | 0.438   | 65         | 43.4       | 17       | 11.3       | 0.573   |
| Tumor diameter (mm)    | 25              | (7–53)     | 23             | (6–70)     | 0.377   | 25         | (7–70)     | 20       | (6–60)     | 0.050   |
| Pathologic stage       |                 |            |                |            |         |            |            |          |            |         |
| IA                     | 38              | 25.3       | 47             | 31.4       |         | 62         | 41.3       | 23       | 15.4       |         |
| IB                     | 14              | 9.3        | 12             | 8.0        |         | 23         | 15.4       | 3        | 2.0        |         |
| IIA                    | 2               | 1.3        | 3              | 2.0        |         | 5          | 3.3        | 0        | 0.0        |         |
| IIB                    | 4               | 2.7        | 2              | 1.3        |         | 4          | 2.7        | 2        | 1.3        |         |
| IIIA                   | 12              | 8.0        | 10             | 6.7        |         | 20         | 13.3       | 2        | 1.3        |         |
| IIIB                   | 2               | 1.3        | 4              | 2.7        | 0.763   | 5          | 3.3        | 1        | 0.7        | 0.207   |
| Pleural invasion       |                 |            |                |            |         |            |            |          |            |         |
| Absent                 | 43              | 28.7       | 59             | 39.3       |         | 79         | 52.6       | 23       | 15.4       |         |
| Present                | 29              | 19.3       | 19             | 12.7       | 0.037   | 40         | 26.7       | 8        | 5.3        | 0.589   |
| Lymphatic invasion     |                 |            |                |            |         |            |            |          |            |         |
| Absent                 | 48              | 32.0       | 53             | 35.3       |         | 79         | 52.6       | 22       | 14.7       |         |
| Present                | 24              | 16.0       | 25             | 16.7       | 0.867   | 40         | 26.7       | 9        | 6.0        | 0.399   |
| Vascular invasion      |                 |            |                |            |         |            |            |          |            |         |
| Absent                 | 47              | 31.3       | 57             | 38.0       |         | 80         | 53.3       | 24       | 16.0       |         |
| Present                | 25              | 16.7       | 21             | 14.0       | 0.301   | 39         | 26.0       | 7        | 4.7        | 0.191   |
| EGFR mutation          |                 |            |                |            |         |            |            |          |            |         |
| Mutant                 | 33              | 23.6       | 29             | 20.7       |         | 53         | 37.9       | 9        | 6.4        |         |
| Wild type              | 35              | 25.0       | 43             | 30.7       | 0.326   | 59         | 42.1       | 19       | 13.6       | 0.108   |
| KRAS mutation          |                 |            |                |            |         |            |            |          |            |         |
| Mutant                 | 10              | 7.1        | 13             | 9.3        |         | 19         | 13.6       | 4        | 2.9        |         |
| Wild type              | 58              | 41.4       | 59             | 42.2       | 0.593   | 93         | 66.4       | 24       | 17.1       | 0.493   |
| Aromatase              |                 |            |                |            |         |            |            |          |            |         |
| High expression        |                 |            |                |            |         | 60         | 40.0       | 12       | 8.0        |         |
| Low expression         |                 |            |                |            |         | 59         | 39.3       | 19       | 12.7       | 0.168   |
| ER $\alpha$            |                 |            |                |            |         |            |            |          |            |         |
| Positive               | 1               | 0.7        | 1              | 0.7        |         | 2          | 1.3        | 0        | 0.0        |         |
| Negative               | 71              | 47.3       | 77             | 51.3       | 0.731   | 117        | 78.0       | 31       | 20.7       | 0.628   |
| ER $\beta$             |                 |            |                |            |         |            |            |          |            |         |
| Positive               | 60              | 40.0       | 59             | 39.3       |         |            |            |          |            |         |
| Negative               | 12              | 8.0        | 19             | 12.7       | 0.168   |            |            |          |            |         |
| PR                     |                 |            |                |            |         |            |            |          |            |         |
| Positive               | 2               | 1.3        | 2              | 1.3        |         | 4          | 2.7        | 0        | 0.0        |         |
| Negative               | 70              | 46.7       | 76             | 50.7       | 0.659   | 115        | 76.7       | 31       | 20.6       | 0.392   |
| HER2                   |                 |            |                |            |         |            |            |          |            |         |
| Positive               | 4               | 2.7        | 3              | 2.0        |         | 7          | 4.7        | 0        | 0.0        |         |
| Negative               | 68              | 45.3       | 75             | 50.0       | 0.455   | 112        | 74.7       | 31       | 20.6       | 0.190   |
| Ki-67 LI (%)           | 18.9            | (1.0–63.1) | 17.3           | (0.2–93.6) | 0.582   | 18.2       | (1.0–66.4) | 17.5     | (0.2–93.6) | 0.865   |

EGFR, epidermal growth factor receptor; ER, estrogen receptor; PR, progesterone receptor; HER2, human epidermal growth factor receptor 2; LI, labeling index.

Prognostic significance of aromatase/ER $\beta$  in lung adenocarcinoma

**Table S2.** Univariate analysis of prognostic factors using the log-rank test in *EGFR* mutant cases

| Variable                  | No. of patients (%) | 5-year OS (%) | Univariate <i>P</i> value | 5-year RFS (%) | Univariate <i>P</i> value |
|---------------------------|---------------------|---------------|---------------------------|----------------|---------------------------|
| All cases                 | 62 (100.0)          | 83.9          |                           | 69.3           |                           |
| Age (years: median 69)    |                     |               |                           |                |                           |
| <69                       | 34 (54.8)           | 85.3          |                           | 67.5           |                           |
| $\geq$ 69                 | 28 (45.2)           | 82.1          | 0.487                     | 71.4           | 0.854                     |
| Sex                       |                     |               |                           |                |                           |
| Male                      | 19 (30.6)           | 89.5          |                           | 73.7           |                           |
| Female                    | 43 (69.4)           | 81.4          | 0.393                     | 67.4           | 0.678                     |
| Smoking status            |                     |               |                           |                |                           |
| Ever-smoker               | 19 (30.6)           | 84.2          |                           | 63.2           |                           |
| Non-smoker                | 43 (69.4)           | 83.7          | 0.867                     | 72.1           | 0.500                     |
| Pathologic stage          |                     |               |                           |                |                           |
| I, II                     | 33 (53.2)           | 92.2          |                           | 82.4           |                           |
| III                       | 29 (46.8)           | 36.4          | <0.001                    | 9.1            | <0.001                    |
| Pleural invasion          |                     |               |                           |                |                           |
| Absent                    | 48 (77.4)           | 87.5          |                           | 74.9           |                           |
| Present                   | 14 (22.6)           | 71.4          | 0.198                     | 50.0           | 0.039                     |
| Lymphatic invasion        |                     |               |                           |                |                           |
| Absent                    | 46 (74.2)           | 91.3          |                           | 82.6           |                           |
| Present                   | 16 (25.8)           | 62.5          | 0.016                     | 31.3           | <0.001                    |
| Vascular invasion         |                     |               |                           |                |                           |
| Absent                    | 47 (75.8)           | 89.4          |                           | 80.9           |                           |
| Present                   | 15 (24.2)           | 66.7          | 0.078                     | 33.3           | 0.001                     |
| <i>KRAS</i> mutation      |                     |               |                           |                |                           |
| Mutant                    | 0 (0.0)             | —             |                           | —              |                           |
| Wild type                 | 62 (100.0)          | 83.9          | —                         | 69.3           | —                         |
| Aromatase                 |                     |               |                           |                |                           |
| High expression           | 33 (53.2)           | 81.8          |                           | 69.7           |                           |
| Low expression            | 29 (46.8)           | 86.2          | 0.861                     | 69.0           | 0.915                     |
| ER $\alpha$               |                     |               |                           |                |                           |
| Positive                  | 0 (0.0)             | —             |                           | —              |                           |
| Negative                  | 62 (100.0)          | 83.9          | —                         | 69.3           | —                         |
| ER $\beta$                |                     |               |                           |                |                           |
| Positive                  | 53 (85.5)           | 84.9          |                           | 67.9           |                           |
| Negative                  | 9 (14.5)            | 77.8          | 0.575                     | 77.8           | 0.677                     |
| PR                        |                     |               |                           |                |                           |
| Positive                  | 1 (1.6)             | 100.0         |                           | 100.0          |                           |
| Negative                  | 61 (98.4)           | 83.6          | 0.649                     | 68.8           | 0.542                     |
| HER2                      |                     |               |                           |                |                           |
| Positive                  | 3 (4.8)             | 66.7          |                           | 33.3           |                           |
| Negative                  | 59 (95.2)           | 84.7          | 0.501                     | 71.1           | 0.034                     |
| Ki-67 LI (%: median 11.5) |                     |               |                           |                |                           |
| Low score                 | 33 (53.2)           | 93.9          |                           | 90.9           |                           |
| High score                | 29 (46.8)           | 72.4          | 0.011                     | 44.8           | <0.001                    |

OS, overall survival; RFS, recurrence-free survival; ER, estrogen receptor; PR, progesterone receptor; HER2, human epidermal growth factor receptor 2; LI, labeling index.

Prognostic significance of aromatase/ER $\beta$  in lung adenocarcinoma

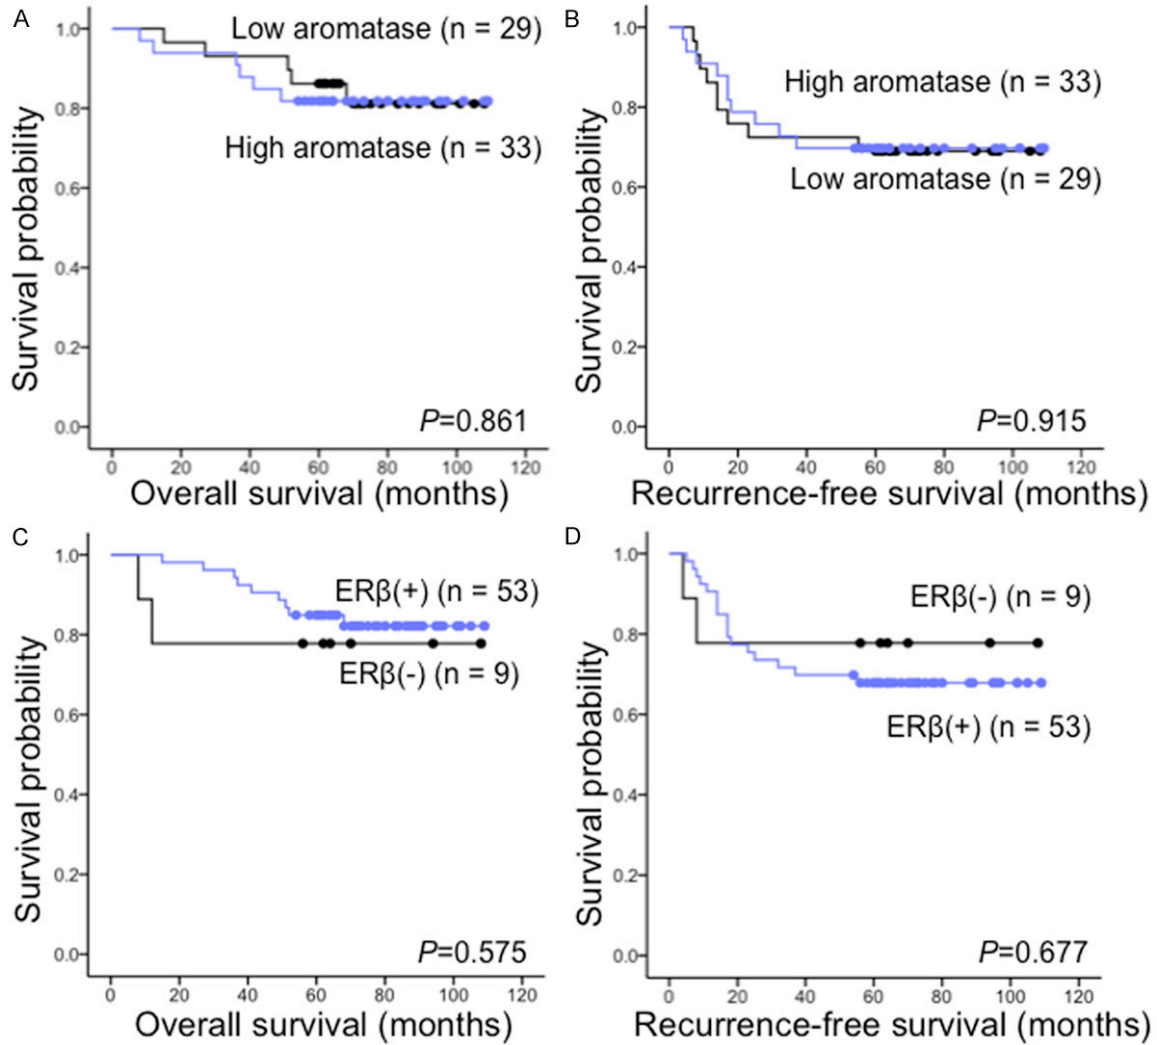

**Figure S1.** Kaplan-Meier survival curves of 62 lung adenocarcinoma patients with EGFR mutations according to the immunoreactivity results for aromatase and ER $\beta$ . A. Overall (OS) stratified by high versus low expression of aromatase. B. Recurrence-free survival (RFS) stratified by high versus low expression of aromatase. C. OS stratified by positive versus negative expression of ER $\beta$ . D. RFS stratified by positive versus negative expression of ER $\beta$ .
